# Supplementary material for: Tergal and pleural structures contribute to the formation of ectopic prothoracic wings in cockroaches
Source: PubMed Central journal article supplement (PMC5108966; doi:10.1098/rsos.160347), 2016-08-03
Supplement: rsos160347supp1.pdf [file rsos160347supp1.pdf]

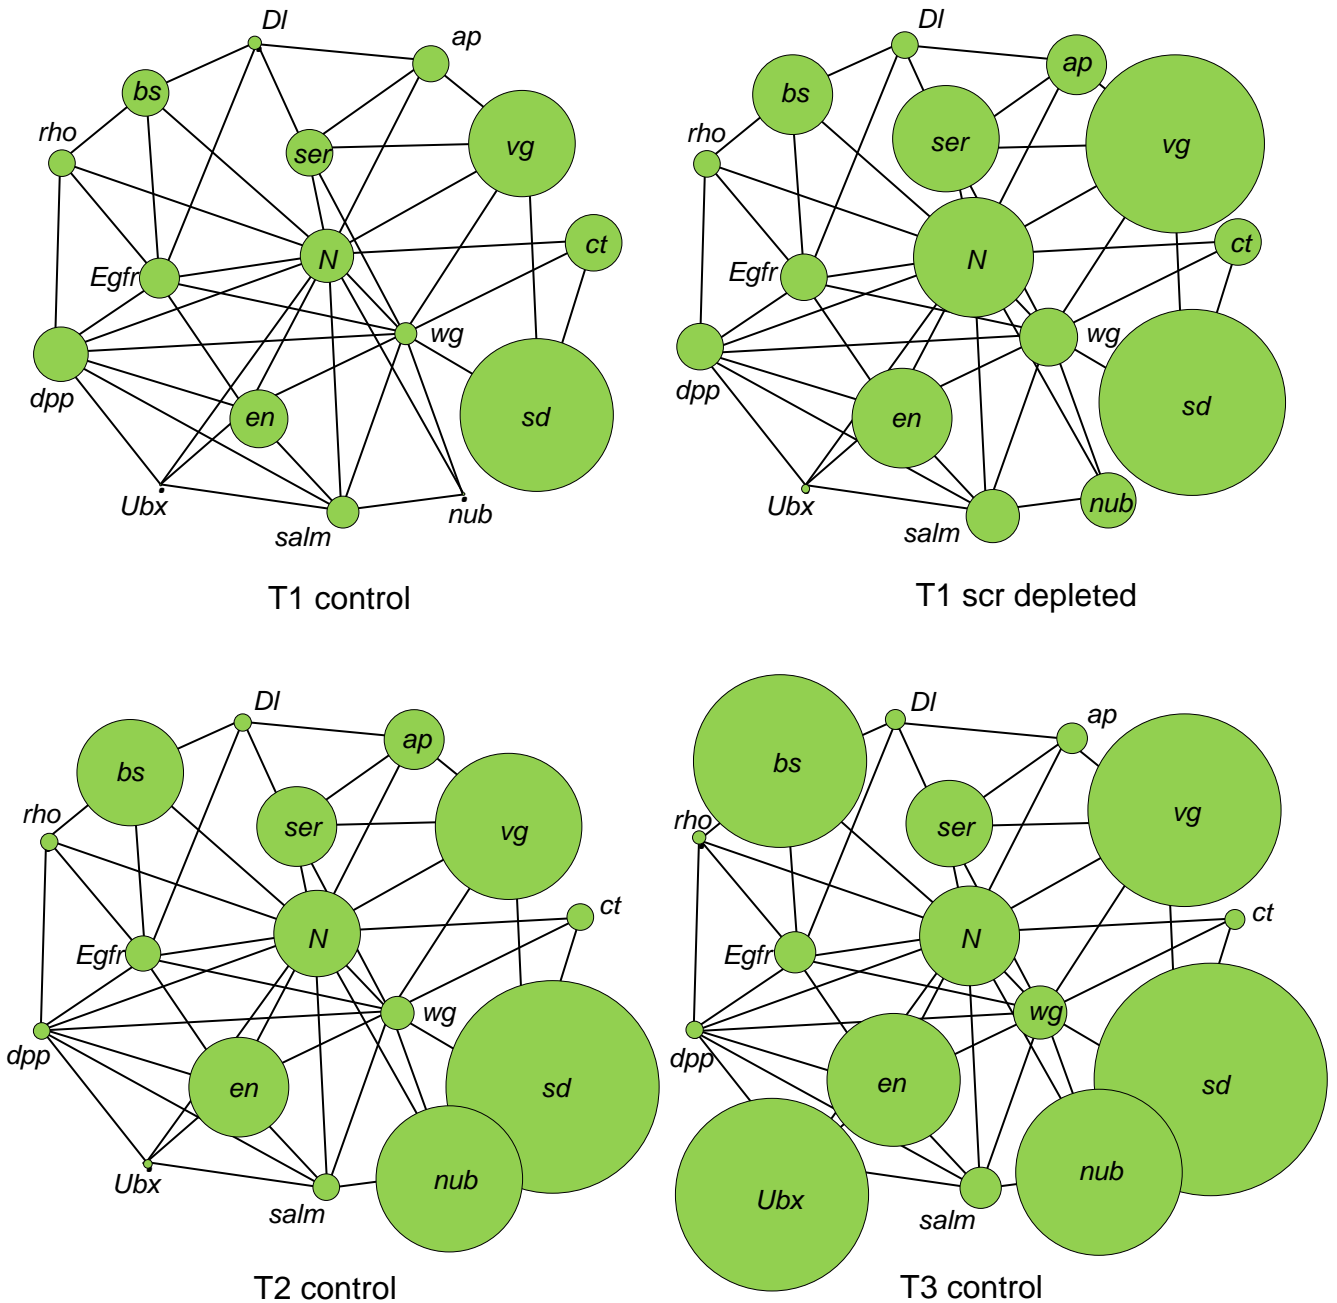

**Figure S1:** Graphical representation of the relative expression of the following 16 genes in control T1, T2 and T3, and in T1 from dsScr-treated specimens of *Blattella germanica*: *apterous (ap)*, *blistered (bs)*, *cut (ct)*, *delta (DI)*, *decapentaplegic (dpp)*, *epidermal growth factor receptor (Egfr)*, *engrailed (en)*, *notch (N)*, *nubbin (nub)*, *rhomboid (rho)*, *scalloped (sd)*, *serrate (Ser)*, *spalt (salm)*, *ultrabithorax (Ubx)*, *vestigial (vg)* and *wingless (wg)*. The diameter of the circles is proportional to the levels of expression according to data of figure 4. The interactions between genes are based on those reported for *Drosophila melanogaster* and depicted using String algorithm (<http://string-db.org>), although most of them have not been (yet) confirmed in *B. germanica*.
