# Supplementary material for: Tergal and pleural structures contribute to the formation of ectopic prothoracic wings in cockroaches
Source: PubMed Central journal article supplement (PMC5108966; doi:10.1098/rsos.160347), 2016-08-03
Supplement: rsos160347supp2.pdf [file rsos160347supp2.pdf]

**Table S1.** Primers used to detect transcript levels by qPCR in *Blattella germanica* tissues and to prepare the dsRNA for RNAi experiments on *Scr*. Gene abbreviations: *ap-a* (*apterous a*), *bs* (*blistered*), *ct* (*cut*), *DI* (*delta*), *dpp* (*decapentaplegic*), *Egfr* (*epidermal growth factor receptor*), *en* (*engrailed*), *N* (*notch*), *nub* (*nubbin*), *rho* (*rhomboid*), *salm* (*spalt*), *Scr* (*sex combs reduced*), *Ser* (*serrate*), *sd* (*scalloped*), *Ubx* (*ultrabithorax*), *vg* (*vestigial*) and *wg* (*wingless*).

| Primer set      | Forward primer (5'-3')  | Reverse primer (5'-3')    | Reference sequence |
|-----------------|-------------------------|---------------------------|--------------------|
| <b>RNAi</b>     |                         |                           |                    |
| <i>Scr</i>      | CTCAGCAAGTCCCTGGTCAT    | AATCGGGGGACTACTCCTTG      | LT216430           |
| <b>qRT-PCR</b>  |                         |                           |                    |
| <i>actin-5c</i> | AGCTTCCTGATGGTCAGGTGA   | TGTCGGCAATTCCAGGGTACATGGT | AJ862721           |
| <i>ap-a</i>     | CGGACTACCTGGATGTTCCG    | TGGTTGATGGCGAAGTACGA      | LT216431           |
| <i>bs</i>       | GACGGAGCTCACGTACAACA    | CCAGCGGTCTTACTTTCTGC      | HF912428.1         |
| <i>ct</i>       | AAATATGTGCTCGGCCTGTC    | TGCATCTTGCGGTAAGTCTGTC    | HF969266.1         |
| <i>DI</i>       | CCACTACAAGTGTTCCGCAA    | TACCTCTCGCATTTCGTCACA     | HF969256.1         |
| <i>dpp</i>      | TGCCCAAAGCTTGTTGTGTG    | ACAGCATGGAGATGGAGGTGA     | HE965018.1         |
| <i>Egfr</i>     | CCAGGTACGCAATGATGAAA    | ATAGGAGTGCGAGGTGGAGA      | HF912429.1         |
| <i>en</i>       | TCTACTGCACCCGCTACTCC    | GAACTCGTGCTTCAGTCGTG      | LT216432           |
| <i>N</i>        | GCTAAGAGGCTGTTGGATGC    | TGCCAGTGTTGTCTGAGAG       | HF969255.1         |
| <i>nub</i>      | CGTCACCAGAAGAAACAACAGA  | CGAGATTGTGGTCTGTGAGAAA    | LT216433           |
| <i>rho</i>      | TGTCCACCACCCTATTTCAT    | CCCATCGCCACTGTGTAGTA      | HF912427.1         |
| <i>salm</i>     | AACTTCTCATCCTCGTCGGC    | GGCTCCGTTGCTCCACATAT      | LT216434           |
| <i>Scr</i>      | TGGATGAAGAGGGTGCATCT    | CTCAATCCTCCGTCTTCTGG      | LT216430           |
| <i>sd</i>       | GCCCACAGAGTGCTTTCTTC    | CCCCTGCCTCATCTTGAATA      | HF969263.1         |
| <i>Ser</i>      | TCCTCTTGGCAGTGCATTTG    | CTTGATCACAGAGGATGCCG      | HG515375.1         |
| <i>Ubx</i>      | AAGAGGTCGCCAGACGTACA    | TTGGAACCAAATTTGATCTGTC    | LT216435           |
| <i>vg</i>       | AACTGTGTGGTGTTCACACTACT | AAGGAGGGAAGTTGCGAGC       | LN901335           |
| <i>wg</i>       | CTTGCAGGTGAAGACATGC     | TCGAAGCGGTCTTTGAGGTT      | HE965017.1         |
